# Supplementary material
Source: ML conference proceedings conference paper supplement (https://aclanthology.org/2026.semeval-1.394)

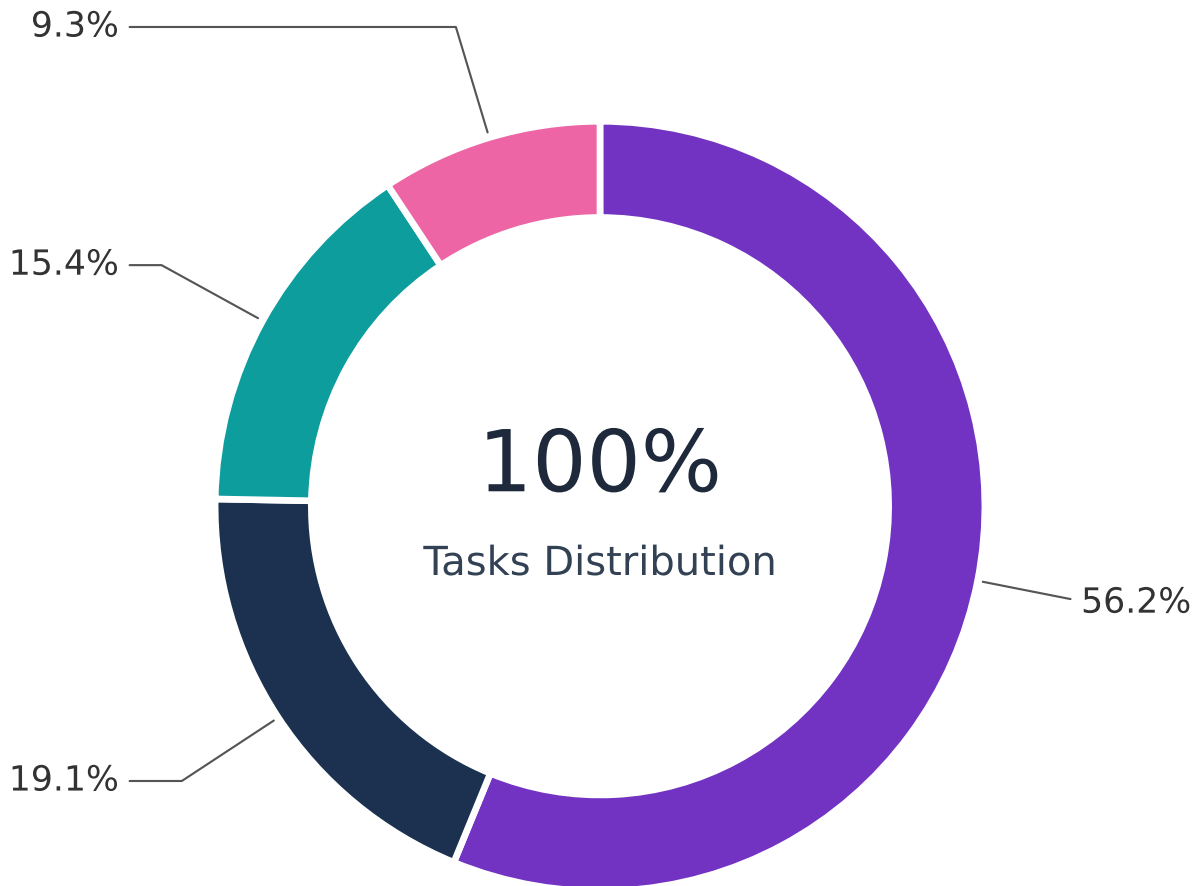

ANSWERABLE UNANSWERABLE UNDERSPECIFIED PARTIAL

Supplement: SupplementaryMaterial [file fig_answerability.pdf › fig_answerability.pdf]
